# Supplementary material
Source: PubMed Central journal article supplement (PMC5038004)
Supplement: JB.00309-16_zjb999094197so1.pdf [file JB.00309-16_zjb999094197so1.pdf]

**Table S1 Bacterial strains and plasmids used in this study**

| <b>Strain or plasmid</b>          | <b>Relevant characteristic</b>                                                                                                  | <b>Source</b>         |
|-----------------------------------|---------------------------------------------------------------------------------------------------------------------------------|-----------------------|
| <b><i>E. coli</i> strains</b>     |                                                                                                                                 |                       |
| S17-1 $\lambda$ pir               | <i>recA, thi, pro, hsdR-M+</i> [RP4-2-Tc::Mu::Km <sup>R</sup> Tn7] ( $\lambda$ pir);<br>Tp <sup>R</sup> Str <sup>R</sup>        | (1)                   |
| MC4100                            | F- <i>araD139</i> $\Delta$ ( <i>argF-lac</i> )U169 <i>rpsL150 relA1 flbB5301</i><br><i>deoC1 ptsF25 rbsR</i> ; Str <sup>R</sup> | (2)                   |
| <b><i>V. cholerae</i> strains</b> |                                                                                                                                 |                       |
| O395                              | Classical O1, Ogawa, Str <sup>R</sup> derivative                                                                                | (3)                   |
| RT4368                            | O395 $\Delta$ <i>tcpB1</i> ; Str <sup>R</sup>                                                                                   | (4)                   |
| RT4372                            | O395 $\Delta$ <i>tcpF1</i> ; Str <sup>R</sup>                                                                                   | (4)                   |
| CL101                             | O395 CTX-Km $\Phi$ ; Str <sup>R</sup> /Km <sup>R</sup>                                                                          | (4)                   |
| TK223                             | O395 $\Delta$ <i>tcpB</i> pTK85, Str <sup>R</sup> /Ap <sup>R</sup>                                                              | Laboratory collection |
| JMM191                            | O395 $\Delta$ <i>tcpB</i> pBAD22, Str <sup>R</sup> /Ap <sup>R</sup>                                                             | Laboratory collection |
| CAH034                            | O395 $\Delta$ <i>tcpB</i> pCHG003, Str <sup>R</sup> /Ap <sup>R</sup>                                                            | This study            |
| CAH038                            | O395 $\Delta$ <i>tcpB</i> pCHG005; Str <sup>R</sup> /Ap <sup>R</sup>                                                            | This study            |
| CAH067                            | O395 $\Delta$ <i>tcpB</i> pCHG016; Str <sup>R</sup> /Ap <sup>R</sup>                                                            | This study            |
| CAH068                            | O395 $\Delta$ <i>tcpB</i> pCHG017; Str <sup>R</sup> /Ap <sup>R</sup>                                                            | This study            |

| <b>Strain or plasmid</b> | <b>Relevant characteristic</b>                               | <b>Source</b> |
|--------------------------|--------------------------------------------------------------|---------------|
| JMM283                   | O395 $\Delta tcpB$ pJMA32; Str <sup>R</sup> /Ap <sup>R</sup> | This study    |
| JMM285                   | O395 $\Delta tcpB$ pJMA33; Str <sup>R</sup> /Ap <sup>R</sup> | This study    |
| JMM329                   | O395 $\Delta tcpB$ pJMA34; Str <sup>R</sup> /Ap <sup>R</sup> | This study    |
| JMM301                   | O395 $\Delta tcpB$ pJMA35; Str <sup>R</sup> /Ap <sup>R</sup> | This study    |
| JMM318                   | O395 $\Delta tcpB$ pJMA36; Str <sup>R</sup> /Ap <sup>R</sup> | This study    |
| JMM319                   | O395 $\Delta tcpB$ pJMA37; Str <sup>R</sup> /Ap <sup>R</sup> | This study    |
| JMM321                   | O395 $\Delta tcpB$ pJMA38; Str <sup>R</sup> /Ap <sup>R</sup> | This study    |
| JMM322                   | O395 $\Delta tcpB$ pJMA39; Str <sup>R</sup> /Ap <sup>R</sup> | This study    |
| JMM323                   | O395 $\Delta tcpB$ pJMA40; Str <sup>R</sup> /Ap <sup>R</sup> | This study    |
| JMM324                   | O395 $\Delta tcpB$ pJMA41; Str <sup>R</sup> /Ap <sup>R</sup> | This study    |
| JMM325                   | O395 $\Delta tcpB$ pJMA42; Str <sup>R</sup> /Ap <sup>R</sup> | This study    |
| JMM327                   | O395 $\Delta tcpB$ pJMA43; Str <sup>R</sup> /Ap <sup>R</sup> | This study    |
| JMM330                   | O395 $\Delta tcpB$ pJMA45; Str <sup>R</sup> /Ap <sup>R</sup> | This study    |
| JMM328                   | O395 $\Delta tcpB$ pJMA46; Str <sup>R</sup> /Ap <sup>R</sup> | This study    |
| JMM371                   | O395 $\Delta tcpB$ pJMA47; Str <sup>R</sup> /Ap <sup>R</sup> | This study    |

| <b>Strain or plasmid</b> | <b>Relevant characteristic</b>                               | <b>Source</b> |
|--------------------------|--------------------------------------------------------------|---------------|
| JMM373                   | O395 $\Delta tcpB$ pJMA48; Str <sup>R</sup> /Ap <sup>R</sup> | This study    |
| JMM377                   | O395 $\Delta tcpB$ pJMA49; Str <sup>R</sup> /Ap <sup>R</sup> | This study    |
| JMM369                   | O395 $\Delta tcpB$ pJMA50; Str <sup>R</sup> /Ap <sup>R</sup> | This study    |
| JMM375                   | O395 $\Delta tcpB$ pJMA51; Str <sup>R</sup> /Ap <sup>R</sup> | This study    |
| JMM379                   | O395 $\Delta tcpB$ pJMA52; Str <sup>R</sup> /Ap <sup>R</sup> | This study    |
| JMM382                   | O395 $\Delta tcpB$ pJMA53; Str <sup>R</sup> /Ap <sup>R</sup> | This study    |
| JMM438                   | O395 $\Delta tcpB$ pJMA54; Str <sup>R</sup> /Ap <sup>R</sup> | This study    |
| JMM427                   | O395 $\Delta tcpB$ pJMA55; Str <sup>R</sup> /Ap <sup>R</sup> | This study    |
| JMM428                   | O395 $\Delta tcpB$ pJMA56; Str <sup>R</sup> /Ap <sup>R</sup> | This study    |
| JMM419                   | O395 $\Delta tcpB$ pJMA57; Str <sup>R</sup> /Ap <sup>R</sup> | This study    |
| JMM420                   | O395 $\Delta tcpB$ pJMA58; Str <sup>R</sup> /Ap <sup>R</sup> | This study    |
| JMM421                   | O395 $\Delta tcpB$ pJMA59; Str <sup>R</sup> /Ap <sup>R</sup> | This study    |
| JMM422                   | O395 $\Delta tcpB$ pJMA60; Str <sup>R</sup> /Ap <sup>R</sup> | This study    |
| JMM423                   | O395 $\Delta tcpB$ pJMA61; Str <sup>R</sup> /Ap <sup>R</sup> | This study    |
| JMM424                   | O395 $\Delta tcpB$ pJMA62; Str <sup>R</sup> /Ap <sup>R</sup> | This study    |

| <b>Strain or plasmid</b> | <b>Relevant characteristic</b>                               | <b>Source</b> |
|--------------------------|--------------------------------------------------------------|---------------|
| JMM429                   | O395 $\Delta tcpB$ pJMA63; Str <sup>R</sup> /Ap <sup>R</sup> | This study    |
| JMM430                   | O395 $\Delta tcpB$ pJMA64; Str <sup>R</sup> /Ap <sup>R</sup> | This study    |
| JMM431                   | O395 $\Delta tcpB$ pJMA65; Str <sup>R</sup> /Ap <sup>R</sup> | This study    |
| JMM432                   | O395 $\Delta tcpB$ pJMA66; Str <sup>R</sup> /Ap <sup>R</sup> | This study    |
| JMM433                   | O395 $\Delta tcpB$ pJMA67; Str <sup>R</sup> /Ap <sup>R</sup> | This study    |
| JMM434                   | O395 $\Delta tcpB$ pJMA68; Str <sup>R</sup> /Ap <sup>R</sup> | This study    |
| JMM435                   | O395 $\Delta tcpB$ pJMA69; Str <sup>R</sup> /Ap <sup>R</sup> | This study    |
| JMM425                   | O395 $\Delta tcpB$ pJMA70; Str <sup>R</sup> /Ap <sup>R</sup> | This study    |
| JMM426                   | O395 $\Delta tcpB$ pJMA71; Str <sup>R</sup> /Ap <sup>R</sup> | This study    |
| JMM448                   | O395 $\Delta tcpB$ pJMA72; Str <sup>R</sup> /Ap <sup>R</sup> | This study    |
| JMM449                   | O395 $\Delta tcpB$ pJMA73; Str <sup>R</sup> /Ap <sup>R</sup> | This study    |
| JMM450                   | O395 $\Delta tcpB$ pJMA74; Str <sup>R</sup> /Ap <sup>R</sup> | This study    |
| JMM451                   | O395 $\Delta tcpB$ pJMA75; Str <sup>R</sup> /Ap <sup>R</sup> | This study    |
| JMM452                   | O395 $\Delta tcpB$ pJMA76; Str <sup>R</sup> /Ap <sup>R</sup> | This study    |
| JMM458                   | O395 $\Delta tcpB$ pJMA82; Str <sup>R</sup> /Ap <sup>R</sup> | This study    |

| <b>Strain or plasmid</b> | <b>Relevant characteristic</b>                               | <b>Source</b> |
|--------------------------|--------------------------------------------------------------|---------------|
| JMM459                   | O395 $\Delta tcpB$ pJMA83; Str <sup>R</sup> /Ap <sup>R</sup> | This study    |
| JMM460                   | O395 $\Delta tcpB$ pJMA84; Str <sup>R</sup> /Ap <sup>R</sup> | This study    |
| JMM461                   | O395 $\Delta tcpB$ pJMA85; Str <sup>R</sup> /Ap <sup>R</sup> | This study    |
| JMM462                   | O395 $\Delta tcpB$ pJMA86; Str <sup>R</sup> /Ap <sup>R</sup> | This study    |
| RT4634                   | O395 <i>tcpB</i> :E5V; Str <sup>R</sup>                      | This study    |
| RT4635                   | O395 <i>tcpB</i> :R26E; Str <sup>R</sup>                     | This study    |
| RT4637                   | O395 <i>tcpB</i> :E83R; Str <sup>R</sup>                     | This study    |
| RT4638                   | O395 <i>tcpB</i> :C85A; Str <sup>R</sup>                     | This study    |
| RT4639                   | O395 <i>tcpB</i> :C85S; Str <sup>R</sup>                     | This study    |
| RT4640                   | O395 <i>tcpB</i> :C107A; Str <sup>R</sup>                    | This study    |
| RT4641                   | O395 <i>tcpB</i> :C107S; Str <sup>R</sup>                    | This study    |
| RT4642                   | O395 <i>tcpB</i> :LCWD249-252AAAA; Str <sup>R</sup>          | This study    |
| RT4644                   | O395 <i>tcpB</i> :C250A; Str <sup>R</sup>                    | This study    |
| RT4645                   | O395 <i>tcpB</i> :C250S; Str <sup>R</sup>                    | This study    |
| RT4646                   | O395 <i>tcpB</i> :W251A; Str <sup>R</sup>                    | This study    |

| <b>Strain or plasmid</b> | <b>Relevant characteristic</b>                                | <b>Source</b> |
|--------------------------|---------------------------------------------------------------|---------------|
| RT4648                   | O395 <i>tcpB</i> :C261A; Str <sup>R</sup>                     | This study    |
| RT4649                   | O395 <i>tcpB</i> :C261S; Str <sup>R</sup>                     | This study    |
| RT4650                   | O395 <i>tcpB</i> :K278A; Str <sup>R</sup>                     | This study    |
| RT4651                   | O395 <i>tcpB</i> :D281A; Str <sup>R</sup>                     | This study    |
| RT4652                   | O395 <i>tcpB</i> :F307A; Str <sup>R</sup>                     | This study    |
| RT4653                   | O395 <i>tcpB</i> :K314A; Str <sup>R</sup>                     | This study    |
| RT4654                   | O395 <i>tcpB</i> :C321A; Str <sup>R</sup>                     | This study    |
| RT4655                   | O395 <i>tcpB</i> :C321S; Str <sup>R</sup>                     | This study    |
| RT4656                   | O395 <i>tcpB</i> :KD351-2AA; Str <sup>R</sup>                 | This study    |
| RT4657                   | O395 <i>tcpB</i> :S353A; Str <sup>R</sup>                     | This study    |
| RT4658                   | O395 <i>tcpB</i> :H366A; Str <sup>R</sup>                     | This study    |
| RT4659                   | O395 <i>tcpB</i> :W383A; Str <sup>R</sup>                     | This study    |
| RT4660                   | O395 <i>tcpB</i> :Δ392-401, RNPK408-411AKNA; Str <sup>R</sup> | This study    |
| RT4661                   | O395 <i>tcpB</i> :W420A; Str <sup>R</sup>                     | This study    |
| RT4662                   | O395 <i>tcpB</i> :C421S; Str <sup>R</sup>                     | This study    |

| Strain or plasmid | Relevant characteristic                                           | Source                |
|-------------------|-------------------------------------------------------------------|-----------------------|
| <b>Plasmids</b>   |                                                                   |                       |
| pKAS32            | pGP704 <i>rpsL</i> ; Ap <sup>R</sup>                              | (5)                   |
| pMIN1             | pACYC184 Gm cassette from pUCGM; Gm <sup>R</sup> /Cm <sup>R</sup> | (6)                   |
| pTK85             | pBAD22 6His- <i>tcpB</i> ; Ap <sup>R</sup>                        | Laboratory collection |
| pBAD22            | pMB1 <i>Para</i> promoter, <i>araC</i> ; Ap <sup>R</sup>          | (7)                   |
| pCHG003           | pBAD22 6His- <i>tcpB</i> :C421S; Ap <sup>R</sup>                  | This study            |
| pCHG005           | pBAD22 6His- <i>tcpB</i> :W420A; Ap <sup>R</sup>                  | This study            |
| pCHG016           | pBAD22 6His- <i>tcpB</i> :L249A; Ap <sup>R</sup>                  | This study            |
| pCHG017           | pBAD22 6His- <i>tcpB</i> :W251A; Ap <sup>R</sup>                  | This study            |
| pCHG018           | pBAD22 6His- <i>tcpB</i> :D252A; Ap <sup>R</sup>                  | This study            |
| pJMA32            | pBAD22 6His- <i>tcpB</i> :K363A; Ap <sup>R</sup>                  | This study            |
| pJMA33            | pBAD22 6His- <i>tcpB</i> :D384A; Ap <sup>R</sup>                  | This study            |
| pJMA34            | pBAD22 6His- <i>tcpB</i> :KD351-2AA; Ap <sup>R</sup>              | This study            |
| pJMA35            | pBAD22 6His- <i>tcpB</i> :KD359-60AA; Ap <sup>R</sup>             | This study            |
| pJMA36            | pBAD22 6His- <i>tcpB</i> :RNPK408-411AAAA; Ap <sup>R</sup>        | This study            |

| <b>Strain or plasmid</b> | <b>Relevant characteristic</b>                                | <b>Source</b> |
|--------------------------|---------------------------------------------------------------|---------------|
| pJMA37                   | pBAD22 6His- <i>tcpB</i> :C85A; Ap <sup>R</sup>               | This study    |
| pJMA38                   | pBAD22 6His- <i>tcpB</i> :C250A; Ap <sup>R</sup>              | This study    |
| pJMA39                   | pBAD22 6His- <i>tcpB</i> :C261A; Ap <sup>R</sup>              | This study    |
| pJMA40                   | pBAD22 6His- <i>tcpB</i> :C321A; Ap <sup>R</sup>              | This study    |
| pJMA41                   | pBAD22 6His- <i>tcpB</i> :R328A; Ap <sup>R</sup>              | This study    |
| pJMA42                   | pBAD22 6His- <i>tcpB</i> :E348A; Ap <sup>R</sup>              | This study    |
| pJMA43                   | pBAD22 6His- <i>tcpB</i> :K381A; Ap <sup>R</sup>              | This study    |
| pJMA45                   | pBAD22 6His- <i>tcpB</i> :LCWD249-252AAAA; Ap <sup>R</sup>    | This study    |
| pJMA46                   | pBAD22 6His- <i>tcpB</i> :L262P, KD351-352AA; Ap <sup>R</sup> | This study    |
| pJMA47                   | pBAD22; 6His- <i>tcpB</i> :D309A; Ap <sup>R</sup>             | This study    |
| pJMA48                   | pBAD22 6His- <i>tcpB</i> :K295A; Ap <sup>R</sup>              | This study    |
| pJMA49                   | pBAD22 6His- <i>tcpB</i> :K278A; Ap <sup>R</sup>              | This study    |
| pJMA50                   | pBAD22 6His- <i>tcpB</i> :K314A; Ap <sup>R</sup>              | This study    |
| pJMA51                   | pBAD22 6His- <i>tcpB</i> :D281A; Ap <sup>R</sup>              | This study    |
| pJMA52                   | pBAD22 6His- <i>tcpB</i> :K272A; Ap <sup>R</sup>              | This study    |



| <b>Strain or plasmid</b> | <b>Relevant characteristic</b>                             | <b>Source</b> |
|--------------------------|------------------------------------------------------------|---------------|
| pJMA53                   | pBAD22 6His- <i>tcpB</i> :K297A; Ap <sup>R</sup>           | This study    |
| pJMA54                   | pBAD22 6His- <i>tcpB</i> :C107A; Ap <sup>R</sup>           | This study    |
| pJMA55                   | pBAD22 6His- <i>tcpB</i> :E392A; Ap <sup>R</sup>           | This study    |
| pJMA56                   | pBAD22 6His- <i>tcpB</i> :D402A; Ap <sup>R</sup>           | This study    |
| pJMA57                   | pBAD22 6His- <i>tcpB</i> :RNPK408-411ANPA; Ap <sup>R</sup> | This study    |
| pJMA58                   | pBAD22 6His- <i>tcpB</i> :D252A; Ap <sup>R</sup>           | This study    |
| pJMA59                   | pBAD22 6His- <i>tcpB</i> :H366A; Ap <sup>R</sup>           | This study    |
| pJMA60                   | pBAD22 6His- <i>tcpB</i> :K286A; Ap <sup>R</sup>           | This study    |
| pJMA61                   | pBAD22 6His- <i>tcpB</i> :D276A; Ap <sup>R</sup>           | This study    |
| pJMA62                   | pBAD22 6His- <i>tcpB</i> :E274A; Ap <sup>R</sup>           | This study    |
| pJMA63                   | pBAD22 6His- <i>tcpB</i> :W383A; Ap <sup>R</sup>           | This study    |
| pJMA64                   | pBAD22 6His- <i>tcpB</i> :S370A; Ap <sup>R</sup>           | This study    |
| pJMA65                   | pBAD22 6His- <i>tcpB</i> :L369A; Ap <sup>R</sup>           | This study    |
| pJMA66                   | pBAD22 6His- <i>tcpB</i> :S362A; Ap <sup>R</sup>           | This study    |
| pJMA67                   | pBAD22 6His- <i>tcpB</i> :S353A; Ap <sup>R</sup>           | This study    |

| <b>Strain or plasmid</b> | <b>Relevant characteristic</b>                                       | <b>Source</b> |
|--------------------------|----------------------------------------------------------------------|---------------|
| pJMA68                   | pBAD22 6His- <i>tcpB</i> :SS334-335AA; Ap <sup>R</sup>               | This study    |
| pJMA69                   | pBAD22 6His- <i>tcpB</i> :F307A; Ap <sup>R</sup>                     | This study    |
| pJMA70                   | pBAD22 6His- <i>tcpB</i> :E392A, D402A; Ap <sup>R</sup>              | This study    |
| pJMA71                   | pBAD22 6His- <i>tcpB</i> :Δ392-401, RNPK408-411AKNA; Ap <sup>R</sup> | This study    |
| pJMA72                   | pBAD22 6His- <i>tcpB</i> :C85S; Ap <sup>R</sup>                      | This study    |
| pJMA73                   | pBAD22 6His- <i>tcpB</i> :C107S; Ap <sup>R</sup>                     | This study    |
| pJMA74                   | pBAD22 6His- <i>tcpB</i> :C321S; Ap <sup>R</sup>                     | This study    |
| pJMA75                   | pBAD22 6His- <i>tcpB</i> :C250S; Ap <sup>R</sup>                     | This study    |
| pJMA76                   | pBAD22 6His- <i>tcpB</i> :C261S; Ap <sup>R</sup>                     | This study    |
| pJMA82                   | pBAD22 6His- <i>tcpB</i> :E5V; Ap <sup>R</sup>                       | This study    |
| pJMA83                   | pBAD22 6His- <i>tcpB</i> :R26E; Ap <sup>R</sup>                      | This study    |
| pJMA84                   | pBAD22 6His- <i>tcpB</i> :E83R; Ap <sup>R</sup>                      | This study    |
| pJMA85                   | pBAD22 6His- <i>tcpB</i> :K81A; Ap <sup>R</sup>                      | This study    |
| pJMA86                   | pBAD22 6His- <i>tcpB</i> :W79A; Ap <sup>R</sup>                      | This study    |
| pTRNS101                 | pKAS32 <i>tcpB</i> ; Ap <sup>R</sup>                                 | This study    |

| <b>Strain or plasmid</b> | <b>Relevant characteristic</b>             | <b>Source</b> |
|--------------------------|--------------------------------------------|---------------|
| pCHG006                  | pKAS32 <i>tcpB</i> :E5V; Ap <sup>R</sup>   | This study    |
| pCHG010                  | pKAS32 <i>tcpB</i> :R26E; Ap <sup>R</sup>  | This study    |
| pCHG007                  | pKAS32 <i>tcpB</i> :E83R; Ap <sup>R</sup>  | This study    |
| pCHG008                  | pKAS32 <i>tcpB</i> :C85A; Ap <sup>R</sup>  | This study    |
| pCHG011                  | pKAS32 <i>tcpB</i> :C85S; Ap <sup>R</sup>  | This study    |
| pCHG014                  | pKAS32 <i>tcpB</i> :C107A; Ap <sup>R</sup> | This study    |
| pCHG009                  | pKAS32 <i>tcpB</i> :C107S; Ap <sup>R</sup> | This study    |
| pCHG015                  | pKAS32 <i>tcpB</i> :C250A; Ap <sup>R</sup> | This study    |
| pTRNS118                 | pKAS32 <i>tcpB</i> :C250S; Ap <sup>R</sup> | This study    |
| pCHG020                  | pKAS32 <i>tcpB</i> :W251A; Ap <sup>R</sup> | This study    |
| pCHG012                  | pKAS32 <i>tcpB</i> :C261A; Ap <sup>R</sup> | This study    |
| pTRNS119                 | pKAS32 <i>tcpB</i> :C261S; Ap <sup>R</sup> | This study    |
| pTRNS112                 | pKAS32 <i>tcpB</i> :K278A; Ap <sup>R</sup> | This study    |
| pTRNS109                 | pKAS32 <i>tcpB</i> :D281A; Ap <sup>R</sup> | This study    |
| pCHG013                  | pKAS32 <i>tcpB</i> :F307A; Ap <sup>R</sup> | This study    |

| <b>Strain or plasmid</b> | <b>Relevant characteristic</b>                                 | <b>Source</b> |
|--------------------------|----------------------------------------------------------------|---------------|
| pTRNS110                 | pKAS32 <i>tcpB</i> :K314A; Ap <sup>R</sup>                     | This study    |
| pTRNS111                 | pKAS32 <i>tcpB</i> :C321A; Ap <sup>R</sup>                     | This study    |
| pTRNS116                 | pKAS32 <i>tcpB</i> :C321S; Ap <sup>R</sup>                     | This study    |
| pTRNS113                 | pKAS32 <i>tcpB</i> :KD351-2AA; Ap <sup>R</sup>                 | This study    |
| pTRNS132                 | pKAS32 <i>tcpB</i> :S353A; Ap <sup>R</sup>                     | This study    |
| pTRNS115                 | pKAS32 <i>tcpB</i> :H366A; Ap <sup>R</sup>                     | This study    |
| pTRNS114                 | pKAS32 <i>tcpB</i> :W383A; Ap <sup>R</sup>                     | This study    |
| pTRNS120                 | pKAS32 <i>tcpB</i> :Δ392-401, RNPK408-411AKNA; Ap <sup>R</sup> | This study    |
| pTRNS133                 | pKAS32 <i>tcpB</i> :C421S; Ap <sup>R</sup>                     | This study    |

Abbreviations used: Ap<sup>R</sup> - ampicillin resistance; Km<sup>R</sup> - kanamycin resistance; Str<sup>R</sup> - streptomycin resistance; Tp<sup>R</sup> - trimethoprim resistance

|

## Literature Cited.

1. **DeLorenzo RA, Vista JP.** 1994. Another hazard of hypertonic dextrose. *Am J Emerg Med* **12**:262-263.
2. **Silhavy TJ, Berman ML, Enquist LW, Cold Spring Harbor Laboratory.** 1984. Experiments with gene fusions. Cold Spring Harbor Laboratory, Cold Spring Harbor, N.Y.
3. **Taylor RK, Miller VL, Furlong DB, Mekalanos JJ.** 1987. Use of *phoA* gene fusions to identify a pilus colonization factor coordinately regulated with cholera toxin. *Proc Natl Acad Sci U S A* **84**:2833-2837.
4. **Kirn TJ, Bose N, Taylor RK.** 2003. Secretion of a soluble colonization factor by the TCP type 4 pilus biogenesis pathway in *Vibrio cholerae*. *Mol Microbiol* **49**:81-92.
5. **Skorupski K, Taylor RK.** 1996. Positive selection vectors for allelic exchange. *Gene* **169**:47-52.
6. **Nye MB, Pfau JD, Skorupski K, Taylor RK.** 2000. *Vibrio cholerae* H-NS silences virulence gene expression at multiple steps in the ToxR regulatory cascade. *J Bacteriol* **182**:4295-4303.
7. **Guzman LM, Belin D, Carson MJ, Beckwith J.** 1995. Tight regulation, modulation, and high-level expression by vectors containing the arabinose PBAD promoter. *J Bacteriol* **177**:4121-4130.
